# Supplementary material
Source: ML conference proceedings conference paper supplement (https://openaccess.thecvf.com/content/WACV_2020/html/Xia_Periphery-Fovea_Multi-Resolution_Driving_WACV_2020_paper.html)
Supplement: Supplementary file 1 [file Xia_Periphery-Fovea_Multi-Resolution_Driving_WACV_2020_supplemental.pdf]

Archive with 2 entries (2 files):
- example_videos.mp4
- supp.pdf
