# Supplementary material
Source: ML conference proceedings conference paper supplement (https://openaccess.thecvf.com/content/WACV_2020/html/Xia_Periphery-Fovea_Multi-Resolution_Driving_WACV_2020_paper.html)
Supplement: Supplementary file 1 [file Xia_Periphery-Fovea_Multi-Resolution_Driving_WACV_2020_supplemental.pdf › supp.pdf]

# Supplementary Materials of *Periphery-Fovea Multi-Resolution Driving Model Guided by Human Attention*

Ye Xia   Jinkyu Kim   John Canny   Karl Zipser   Teresa Canas-Bajo   David Whitney  
University of California, Berkeley

{yexia, jinkyu.kim, canny, karlzipser, teresa.canasbajo, dwhitney}@berkeley.edu

## 1. Speed curves of the entire videos of the examples

Figure 5 of the main text shows the ground-truth speed and predicted speed of three examples of pedestrian-involved events. Here, we show the speed curves of the entire videos in which the three events were labeled (Figure S1). It can be seen that our model outperformed the periphery-only model throughout the entire videos.

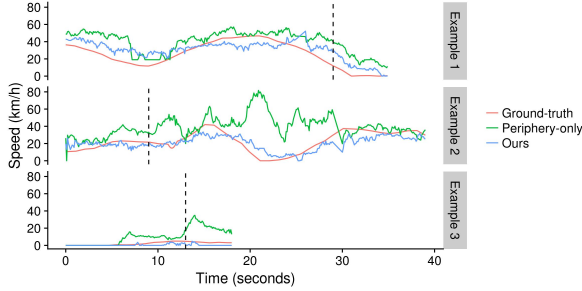

Figure S1: The ground-truth speed and the speed predicted by the periphery-only model and our model for the three examples in Figure 5 in the main text. Our model outperformed the periphery-only model throughout the entire videos.

## 2. Video examples showing the peripheral and foveal inputs and the driving performance of our model

The file *example\_videos.mp4* shows the videos of the examples of Figure 5 in the main manuscript. The video shows the low-resolution peripheral input of our model and the high-resolution foveal regions that our model selected. The foveal regions are highlighted by red squares. The ground-truth speed, the speed predicted by our model, and the speed predicted by the control model (the no-fovea model described in Section 4.5 in the main text) are displayed at the top-left corner.
